# Supplementary material for: Default Mode Network Connectivity Predicts Emotion Recognition and Social Integration After Traumatic Brain Injury
Source: PubMed Central journal article supplement (PMC6696510; doi:10.3389/fneur.2019.00825), 2019-08-09
Supplement: Table_1.pdf [file Table_1.pdf]

**Supplementary Table 1. Emotion recognition predicts DMN connectivity strength after controlling for covariates.** Three linear regression models tested the association between emotion recognition ability (TASIT performance) and each of the DMN ROI-to-ROI connections described in Table 3.

| <i>Predictor variables</i> | <i>Dependent variable</i> |       |      |                       |       |      |                            |       |      |
|----------------------------|---------------------------|-------|------|-----------------------|-------|------|----------------------------|-------|------|
|                            | <b>Connection 1</b>       |       |      | <b>Connection 2</b>   |       |      | <b>Connection 3</b>        |       |      |
|                            | <i>dmPFC-parahipp</i>     |       |      | <i>dmPFC-parahipp</i> |       |      | <i>dmPFC-temporal pole</i> |       |      |
|                            | $\beta$                   | $t$   | $p$  | $\beta$               | $t$   | $p$  | $\beta$                    | $t$   | $p$  |
| TASIT performance          | -.61                      | -3.48 | .001 | -.58                  | -3.17 | .003 | -.47                       | -2.63 | .012 |
| Group status (HC vs. TBI)  | -.16                      | -.83  | .411 | .04                   | .22   | .824 | .39                        | 1.96  | .057 |
| Cognitive composite score  | .37                       | 2.15  | .037 | .30                   | 1.65  | .106 | .14                        | .77   | .444 |
| Age                        | .32                       | 1.88  | .068 | .22                   | 1.23  | .225 | .04                        | .26   | .800 |
| Months since injury        | -.30                      | -1.59 | .119 | -.07                  | -.37  | .712 | .31                        | 1.59  | .119 |
| Gender                     | -.21                      | -1.41 | .165 | -.11                  | -.74  | .466 | .08                        | .50   | .617 |
